# Supplementary material
Source: PubMed Central journal article supplement (PMC7113883)
Supplement: mmc1.pdf [file mmc1.pdf]

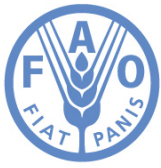

Food and Agriculture  
Organization of the  
United Nations

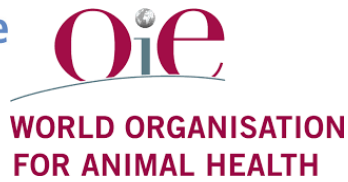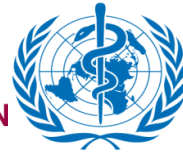

World Health  
Organization

# FAO-OIE-WHO Global Technical Meeting on MERS-CoV

25-27 September 2017, Geneva, Switzerland

Day 1: Monday 25 September 2017 (Venue: Executive Board Room)

| Time        | Topic (speaker)                                                                                                                             |
|-------------|---------------------------------------------------------------------------------------------------------------------------------------------|
| 08:30-09:00 | Registration (outside of Executive Board Room)                                                                                              |
|             | Venue: Executive Board Room                                                                                                                 |
| 09:00-10:30 | Welcome & Introductions – WHO (Sylvie Briand <i>via video</i> ), FAO (Ahmed Elidrissi), OIE (Ghazi Yehia)                                   |
| 09:30-09:50 | Global Situation of MERS 2012-present, Objectives, organization and outputs of the meeting (Maria Van Kerkhove, WHO)                        |
| 09:50-10:10 | The extent of MERS in animals - global overview (Sophie VonDobschuetz, FAO)                                                                 |
| 10:10-10:30 | MERS in Saudi Arabia: Actions taken to identify and respond to MERS in the community and in health care settings (Abdullah Assiri, KSA MOH) |
| 10:30-11:00 | Group Picture and Coffee Break                                                                                                              |
| 11:00-13:00 | Joint Plenary Session: MERS-CoV Diagnostics (Venue: Executive Board Room)<br>Co-Leads: Christian Drosten, Charite & Mona Mahrez, MoA Egypt  |
| 11:00-11:20 | Molecular testing and point of care/rapid tests: Results from molecular diagnostics landscape exercise (Cassandra Kelly, FIND)              |
| 11:20-11:40 | MERS-CoV Serologic Assays: Results from serologic assay comparison (Christian Drosten, on behalf of NIBSC)                                  |
| 11:40-12:00 | Antibody and T cell responses and relationship to clinical disease in MERS survivors (Stanley Perlman, U of Iowa)                           |
| 12:00-12:20 | MERS-CoV Serology and Sequencing in understanding transmission dynamics (Marion Koopmans, Erasmus)                                          |
| 12:00-12:40 | Review of diagnostic tests in Animals (Salama Suhail Al Muhairi, UAE)                                                                       |

|             |                                                                                                                                                    |                                                                                                                           |
|-------------|----------------------------------------------------------------------------------------------------------------------------------------------------|---------------------------------------------------------------------------------------------------------------------------|
| 12:40-13:00 | Discussion: Laboratory capacity building and trainings needed (Discussion and plan development)                                                    |                                                                                                                           |
| 13:00-14:00 | <i>Lunch (outside of the Executive Board Room)</i>                                                                                                 |                                                                                                                           |
| 14:00-15:45 | Parallel Sessions: Surveillance and Laboratory Capacity: Animal and Human Health Sectors                                                           |                                                                                                                           |
|             | Parallel Session I: Surveillance in Humans (Venue: Executive Board Room)<br><i>Co-Leads: Mamun Malik, EMRO and Farida Al Housni, Abu Dhabi MOH</i> | Parallel Session II: Surveillance in Animals (Venue: Salle D)<br><i>Co-Leads: Malik Peiris, HKU and Emma Gardner, FAO</i> |
|             | Examples of country programs + Discussion:                                                                                                         | Viral shedding, immune response, transmission potential in animals (Christian Drosten, Charite) (15 min)                  |
|             | Middle East: KSA (Abdullah Assiri 10 min); Egypt (10 min); Pakistan (10 min); Qatar (10 min);                                                      | MERS-CoV Lab Capacity in the Middle East Animal Health (CAMNET) (OIE Dr Salama Al Muahairi) (15 min)                      |
|             | Europe and Americas: England (Maria Zambon PHE, 10 min), USA (Sue Gerber USCDC, 10 min)                                                            | Camel trading/movement patterns and large scale dromedary events (Bernard Faye <i>video presentation</i> ) (20 min)       |
|             | Asia and South Asia: Thailand (Rome Bauthong, Thailand MOH; 10 minutes), Philippines (de los Reyes, Philippines MOH, 10 min)                       | Camel Supply Chains/Value chains (Ameha Sebsibe, IGAD) (15 min)                                                           |
|             | Questions about country presentations                                                                                                              | Camel seroprevalence studies in Ethiopia (Elias Waleign, FAO) (15 min)                                                    |
|             |                                                                                                                                                    | Camel seroprevalence studies in West and North Africa (Eve Miguel, CIRAD/IRD) (15 min)                                    |

|             |                                                                                      |                                                                           |
|-------------|--------------------------------------------------------------------------------------|---------------------------------------------------------------------------|
| 15:45-16:00 | <i>Coffee Break</i>                                                                  |                                                                           |
| 16:00-17:00 | Parallel Session I: Surveillance in Humans (continued) (Venue: Executive Board Room) | Parallel Session II: Surveillance in Animals (continued) (Venue: Salle D) |

|             |                                                                                                                                                               |                                                                                                                                                                 |
|-------------|---------------------------------------------------------------------------------------------------------------------------------------------------------------|-----------------------------------------------------------------------------------------------------------------------------------------------------------------|
|             | Sampling criteria, triage and earlier identification in health care settings (Hail Alabdaly, KSA MOH, 20 min)                                                 | FAO EPT-2 Activities (Emma Gardner, FAO) (20min)                                                                                                                |
|             | MERS-CoV Lab Capacity by region: Human Health by region (20 min, Chris Oxenford, WHO)                                                                         | Camel Surveillance activities by PREDICT (Ehab Abu-Basha, William B. Karesh and Patrick Dawson, PREDICT) (15min)                                                |
|             | Discussion: Integration of MERS-CoV testing in at risk countries (20 Min)                                                                                     | Risk of introduction to animal populations in non-endemic areas; susceptible animals, surveillance recommendations, best practices, trade measures (Discussion) |
| 17:00-18:00 | Joint Discussion with Parallel Sessions I and II – Surveillance for MERS-CoV in Humans and Animals (Venue: Executive Board Room)                              |                                                                                                                                                                 |
|             | Discussion: Integration of MERS-CoV testing in at risk countries; Risk of introduction in humans in non-endemic countries; Surveillance needs, best practices |                                                                                                                                                                 |
|             | Discussion: Improving MERS surveillance in humans in countries with and without the reservoir, Training Needs for coordinated Surveillance and Investigations |                                                                                                                                                                 |
| 18:00       | <i>Drinks Reception (Winter Café)</i>                                                                                                                         |                                                                                                                                                                 |

## Day 2: Tuesday, 26 September 2017 (Venue: Executive Board Room)

| Time        | Topic                                                                                                                                                                                                           |
|-------------|-----------------------------------------------------------------------------------------------------------------------------------------------------------------------------------------------------------------|
| 8:30-10:30  | Joint Plenary Session (Venue: Executive Board Room)                                                                                                                                                             |
| 8:30-9:00   | Recap from Parallel Session I (Mamun Malik, EMRO and Farida Al Housni, Abu Dhabi MOH (TBD)                                                                                                                      |
| 9:00-9:30   | Recap from Parallel Session II (Malik Peiris, HKU and Emma Gardner, FAO)                                                                                                                                        |
|             | Introduction for MERS-CoV Transmission: (Co-leads: David Hui and Ziad Memish, KSA)                                                                                                                              |
| 9:30-9:50   | Recent advances from basic science in our understanding of the determinants of MERS-CoV transmission (David Hui, Hong Kong)                                                                                     |
| 9:50-10:10  | An in-depth review of changes in demographic development and camel farming practices in Qatar in relation to MERS Coronavirus emergence, spread, and potential for interventions (Elmoubasher Farag, Qatar MOH) |
| 10:10-10:30 | Discussion                                                                                                                                                                                                      |
| 10:30-11:00 | <i>Coffee Break</i>                                                                                                                                                                                             |

|             |                                                                                                                                                                                                   |                                                                                                                                                                                                |
|-------------|---------------------------------------------------------------------------------------------------------------------------------------------------------------------------------------------------|------------------------------------------------------------------------------------------------------------------------------------------------------------------------------------------------|
| 11:00-13:00 | <p>Parallel Session III: Human-to-human transmission<br/>(Venue: Executive Board Room)</p> <p><i>Co-Leads: Abdullah Assiri, KSA MOH and Myoung-don Oh, Seoul National University Hospital</i></p> | <p>Parallel Session IV: Zoonotic Transmission, Regulatory issues, food safety, social science<br/>(Venue: Salle D)</p> <p><i>Co-Leads: Peter Ben Embarek, WHO and Gounalan Pavade, OIE</i></p> |
|             | Extent of Human-to-human transmission of MERS-CoV (Mamun Malik, EMRO, 15 min)                                                                                                                     | Policy and Regulatory Issues Originating from Doha/Oman Declarations (Ahmed ElIdrissi, FAO; 10min)                                                                                             |
|             | Dispersion of particles during aerosolizing procedures in hospitals (David Hui, Hong Kong, 15)                                                                                                    | Case definition of MERS-CoV in animals for disease reporting purposes to the OIE (Mehdi ElHarrak) (10min)                                                                                      |
|             | Risk factors for human-to-human transmission: Infection control implications in investigating hospital outbreaks (Ziad Memish, KSA) (15 min)                                                      | Camel trade and regulations from two perspectives (Momtaz Shahein, AHRI Egypt / Nega Tewolde, FAO Ethiopia) (30min)                                                                            |
|             | Risk factors for human-to-human transmission: results from studies conducted in Korea (YaeJean Kim, Korea) (15 min)                                                                               | Food Safety (Peter Ben Embarek, WHO) (30 min)                                                                                                                                                  |
|             | Risk factors for human-to-human transmission: results from studies conducted in UAE (Farida Al Housni, Abu Dhabi MOH) (15 min)                                                                    | The role of social science interventions in understanding human-human and zoonotic transmission (Discussion)                                                                                   |
|             | Risk Factors for Human-to-human transmission in a large nosocomial outbreak in Riyadh (Hanan Balkhy, KAIMRC) (15 min)                                                                             |                                                                                                                                                                                                |
|             | Discussion: planning needs, research priorities (30 min) Led by Abdullah Assiri and Myoung-Don Oh                                                                                                 |                                                                                                                                                                                                |
| 13:00-14:00 | <i>Lunch (outside of the Executive Board Room)</i>                                                                                                                                                |                                                                                                                                                                                                |
| 14:00-15:45 | <p>Parallel Session V: Clinical Management, Therapeutics and IPC<br/>(Venue Executive Board Room)</p> <p><i>Co-Leads: Nikki Shindo, WHO and Hail Alabady, KSA MOH</i></p>                         | <p>Parallel Session IV: Zoonotic Transmission, Regulatory issues, food safety, social science<br/>(Venue Salle D) (continued)</p>                                                              |

|                    |                                                                                                                                          |                                                                                                                                                                                 |
|--------------------|------------------------------------------------------------------------------------------------------------------------------------------|---------------------------------------------------------------------------------------------------------------------------------------------------------------------------------|
|                    | Natural History Studies and Clinical Management Experience of MERS patients (20 min) (Yaseen Arabi, KAIMRC)                              | Determinants of zoonotic transmission: genetic differences in MERS-CoV viruses from East Africa, West Africa, North Africa and the Middle East (Malik Peiris, HKU) (15 min)     |
|                    | Supportive therapy for MERS patients in the Republic of Korea (Dr Oh, ROK 20 min)                                                        | Risk factors for zoonotic transmission<br>Talk 1: Qatar (Reina Sikkema, ERASMUS) (15 min)                                                                                       |
|                    | Broad-spectrum antiviral activity of GS-5734 for coronaviruses (Thomas Cihlar, Gilead; 20 min)                                           | Talk 2: Kenya/Ethiopia (Elias Walelign, FAO) (10+10min)                                                                                                                         |
|                    | Animal Models to evaluate effective preventive and therapeutic countermeasures against MERS (Kent Tseng, UTMB 20 min)                    | Talk 3: UAE (Farida Al Housni, Abu Dhabi Health Authority or Aron Hall, USCDC) (15 min)                                                                                         |
|                    | Discussion led by Nikki Shindo and Hail Alabdaly (25 min)                                                                                | Talk 4: Egypt (Lotfi Allal, FAO) (15 min)                                                                                                                                       |
|                    |                                                                                                                                          | Panel Discussion                                                                                                                                                                |
| <b>15:45-16:00</b> | <b>Coffee Break</b>                                                                                                                      |                                                                                                                                                                                 |
| <b>16:00-18:00</b> | <b>Parallel Session V: Clinical Management, Therapeutics and IPC (continued) (Venue Executive Board Room)</b>                            | <b>Parallel Session VI: The role of environmental contamination in MERS-CoV transmission</b><br><b>Co-Leads: Frank Konings, WPRO and Mohammed Al-Hajri, Qatar MOH (Salle D)</b> |
|                    | IPC of epidemic and pandemic prone ARI in health care settings, and patients suspected/confirmed with MERS (Hanan Balkhy, KAIMRC 25 min) | Environmental Contamination- results from Hong Kong Workshop (Ada Al-Qunaibet TBC, KAIMRC) (15 min)                                                                             |
|                    | Infection Prevention and Control Policies and barriers to compliance (Dr Hail Alabadly, KSA MOH 25 min)                                  | Summarizing research conducted in Korean Hospitals 2015 (YK Choi, Korea) (20 min)                                                                                               |
|                    | A clinical supportive approach to severe MERS-CoV infection and opportunities for trainings (Janet Diaz, 25 min)                         | Preliminary Results of Experimental Studies of surface and air persistence of MERS-CoV under different environmental conditions (Vincent Munster, NIH; 20 min)                  |
|                    | Discussion: planning needs, research priorities, trainings                                                                               | Environmental studies in community settings (Mohammed El-Hajri, Qatar 15 min)                                                                                                   |

|  |          |                                                                                                                                         |
|--|----------|-----------------------------------------------------------------------------------------------------------------------------------------|
|  | required |                                                                                                                                         |
|  |          | Discussion: Identification of needs, plans for implementation of protocols addressing environmental contamination in community settings |

### Day 3: Wednesday, 27 September 2017 (Venue: Executive Board Room)

| Time        | Topic                                                                                                                                                        |
|-------------|--------------------------------------------------------------------------------------------------------------------------------------------------------------|
| 9:00-10:30  | <b>Plenary Session: Camel and Human Vaccines (Venue Executive Board Room)</b><br>Co-Leads: Vase Moorthy WHO, Albert Osterhaus, RIZ                           |
|             | Update on vaccine options for dromedaries (Erasmus, Bart Haagmans; 15 min)                                                                                   |
|             | Update on vaccine options for dromedaries (Naif Alharbi, KSA; 15 min)                                                                                        |
|             | Challenges and opportunities for dromedary vaccination (Mehdi ElHarrak, Morocco; 15 min)                                                                     |
|             | Update on vaccine options for humans from CEPI (Georges Thiry, CEPI; 15 min)                                                                                 |
|             | Recap from WHO R&D Blueprint: MERS-CoV product development (Vasee Moorthy, WHO). 15 min                                                                      |
|             | Discussion: planning needs, research priorities (15 min)                                                                                                     |
| 10:30-11:00 | <i>Coffee Break</i>                                                                                                                                          |
| 11:00-13:00 | <b>Plenary Joint Session: Feedback from Parallel Sessions</b><br>Co-Leads: Brian McCloskey, PHE & Maria Van Kerkhove, WHO                                    |
|             | Recap from Parallel Session III and discussion (co-leads 30 min)<br>Co-Leads: Abdullah Assiri, KSA MOH and Myoung-don Oh, Seoul National University Hospital |
|             | Recap from Parallel Session IV (co-leads 30 min)<br>Co-Leads: Peter Ben Embarek, WHO and Gounalan Pavade, OIE                                                |
|             | Recap from Parallel Session V (co-leads 30 min)<br>Co-Leads: Nikki Shindo, WHO and Hail Alabadly, KSA MOH                                                    |
|             | Recap from Parallel Session VI (co-leads 30 min)<br>Co-Leads: Frank Konings, WPRO and Mohammed Al-Hajri, Qatar MOH                                           |
| 13:00-14:00 | Lunch                                                                                                                                                        |
| 14:00-      | Wrap up, conclusions and next steps                                                                                                                          |

|             |                                                                                                                          |
|-------------|--------------------------------------------------------------------------------------------------------------------------|
| 15:45       | (Leads: Maria Van Kerkhove, Ahmed Eldrissi, Gounalan Pavade)                                                             |
|             | MERS in the Republic of Korea: Lessons after the outbreak and implemented changes (Youngmee Jee, KCDC <i>via video</i> ) |
|             | MERS-CoV Research Agenda: Proposal and Discussion (Maria Van Kerkhove, WHO)                                              |
|             | Update to the Doha Declaration: A proposal and discussion (Ahmed Eldrissi, FAO)                                          |
|             | Discussion: Opportunities, building capacity, trainings needed and areas for collaboration                               |
| 15:45-16:00 | Coffee Break and Meeting End                                                                                             |
| 16:00-18:00 | <i>Side Meetings (Invitation only)</i>                                                                                   |
